# Supplementary material for: Silencing of Salmonella typhimurium Pathogenesis: Atenolol Acquires Efficient Anti-Virulence Activities
Source: MDPI journal article supplement (doi:10.3390/microorganisms10101976), 2022-10-06
Supplement: s1 [file s1]

## Supplementary Data

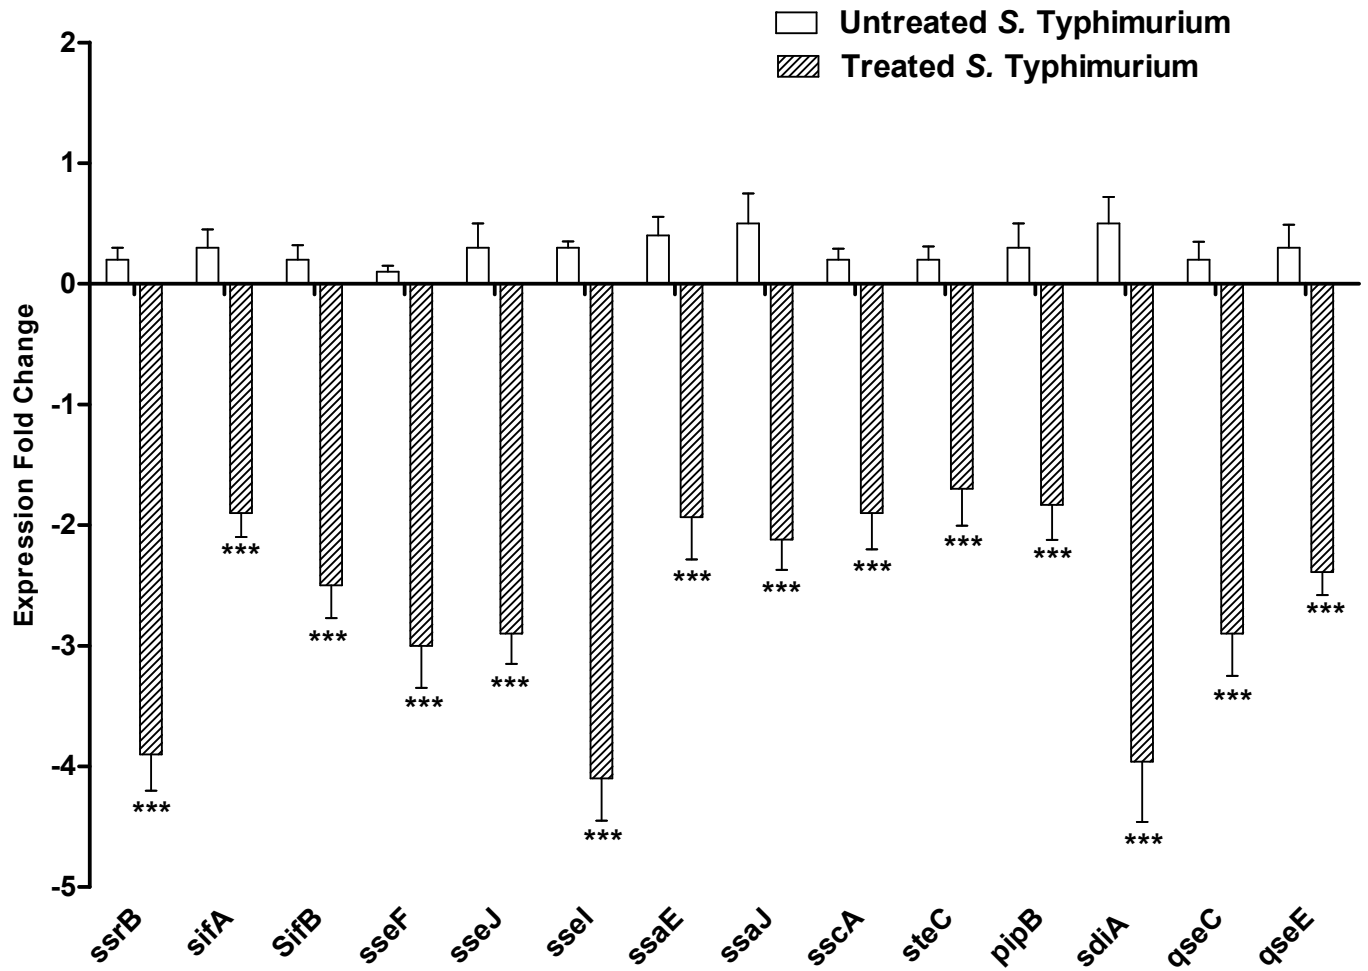

Figure S1. Effect of atenolol at sub-MIC on the expression of *S. Typhimurium* virulence encoding genes. The expression of tested genes was normalized to 16s rRNA housekeeping gene. Atenolol significantly downregulated the expression of *S. Typhimurium* virulence encoding genes (\*\*\*)  $p < 0.0001$ .
